# Supplementary material for: Arl4c promotes the growth and drug resistance of pancreatic cancer by regulating tumor-stromal interactions
Source: PubMed Central journal article supplement (PMC8609020; doi:10.1016/j.isci.2021.103400), 2021-11-03
Supplement: mmc1.pdf [file mmc1.pdf]

**iScience, Volume 24**

**Supplemental information**

**Arl4c promotes the growth  
and drug resistance of pancreatic cancer  
by regulating tumor-stromal interactions**

**Xin Chen, Yanzhen Zhang, Weikun Qian, Liang Han, Wei Li, Wanxing Duan, Zheng Wu, Zheng Wang, and Qingyong Ma**

**Table S1:** The relationship between expression of Arl4c and clinical pathological features in pancreatic cancer, Related to Figure 7.

|                    | Samples<br>(n) | Arl4c expression n (%) |            |           |           | P value <sup>◇</sup> |
|--------------------|----------------|------------------------|------------|-----------|-----------|----------------------|
|                    |                | None                   | Weak       | Moderate  | Strong    |                      |
| sex                |                |                        |            |           |           | 0.9019               |
| Male               | 33             | 3 (5.77)               | 8 (15.38)  | 14(26.92) | 8 (15.38) |                      |
| Female             | 19             | 3 (5.77)               | 4 (7.69)   | 8 (15.38) | 4 (7.69)  |                      |
| Age                |                |                        |            |           |           | 0.56456              |
| <55                | 28             | 4 (7.69)               | 8 (15.38)  | 11(21.15) | 5 (9.6)   |                      |
| >55                | 24             | 2 (3.85)               | 4 (7.69)   | 11(21.15) | 7 (13.46) |                      |
| Histological grade |                |                        |            |           |           | 0.26321              |
| Well               | 9              | 3 (5.77)               | 2 (3.85)   | 3 (5.77)  | 1 (1.92)  |                      |
| Moderate           | 33             | 2 (3.85)               | 8 (15.38)  | 13 (25%)  | 10(19.23) |                      |
| Poor               | 10             | 1 (1.92)               | 2 (3.85)   | 6 (11.54) | 1 (1.92)  |                      |
| TNM stage (AJCC)   |                |                        |            |           |           | 0.01615*             |
| I                  | 2              | 1 (1.92)               | 1 (1.92)   | 0 (0)     | 0 (0)     |                      |
| II                 | 39             | 5 (9.6)                | 11 (21.15) | 18(34.62) | 5 (9.6)   |                      |
| III                | 6              | 0 (0)                  | 0 (0)      | 3 (5.77)  | 3 (5.77)  |                      |
| IV                 | 5              | 0 (0)                  | 0 (0)      | 1 (1.92)  | 4 (7.69)  |                      |
| pT status          |                |                        |            |           |           | 0.21467              |
| T1                 | 3              | 2 (3.85)               | 1 (1.92)   | 0 (0)     | 0 (0)     |                      |
| T2                 | 35             | 3 (5.77)               | 7          | 16(30.77) | 9 (17.31) |                      |
| T3                 | 7              | 0 (0)                  | 2 (3.85)   | 3 (5.77)  | 2 (3.85)  |                      |
| T4                 | 7              | 1 (1.92)               | 2 (3.85)   | 3 (5.77)  | 1 (1.92)  |                      |
| pN status          |                |                        |            |           |           | 0.67789              |
| NO                 | 42             | 4 (7.69)               | 9 (17.31)  | 19(36.54) | 10(19.23) |                      |
| N1                 | 10             | 2 (3.85)               | 3 (5.77)   | 3 (5.77)  | 2 (3.85)  |                      |
| pM status          |                |                        |            |           |           | 0.00995*             |
| M0                 | 45             | 6 (11.54)              | 12 (23.08) | 20(38.46) | 7 (13.46) |                      |
| M1                 | 7              | 0 (0)                  | 0 (0)      | 2 (3.85)  | 5 (9.6)   |                      |

<sup>◇</sup> $\chi^2$  test. \*,  $P < 0.05$ .

**Table S2:** Primers sequences for real-time PCR analysis, Related to STAR Methods.

| <b>Genes</b>   | <b>Primer Sequences</b>                                                            |
|----------------|------------------------------------------------------------------------------------|
| YAP            | Forward:5'-TCCCAGATGAACGTCACAGC-3'<br>Reverse: 5'-TCATGGCAAAACGAGGGTCA-3'          |
| shh            | Forward:5'- GCGACTTCCTCACTTTCCTG -3'<br>Reverse: 5'- CCGGTTGATGAGAATGGTG -3'       |
| VEGF           | Forward:5'- AAGCCAGCACATAGGAGAGATGA-3'<br>Reverse: 5'- TCTTTCTTTGGTCTGCATTCACA-3'  |
| PDGF           | Forward:5'- CCCCTGCCCATTCGGAGGAAGAG-3'<br>Reverse: 5'- TTGGCCACCTTGACGCTGCGGTG -3' |
| TGF $\beta$ 1  | Forward:5'- CCCAGCATCTGCAAAGCTC-3'<br>Reverse: 5'- GTCAATGTACAGCTGCCGCA-3'         |
| CTGF           | Forward:5'-CTTTGGCCCAGACCCAACTA-3'<br>Reverse: 5'-GGCTCTGCTTCTCTAGCCTG-3'          |
| $\beta$ -ACTIN | Forward:5'- AGCGAGTATCCCCCAAAGTT -3'<br>Reverse: 5'- GGGCACGAAGGCTCATCATT -3'      |
